# Supplementary material
Source: PubMed Central journal article supplement (PMC9857760)
Supplement: jamapsychiatry-e224234-s002.pdf [file jamapsychiatry-e224234-s002.pdf]

\*First name, last name, and suffix (if applicable) are required and will appear in PubMed.

| <b>*Group Name(s): CLOZIN (Clozapine International Consortium) investigators; GROUP (Genetic Risk and Outcome of Psychosis) investigators</b> |                   |                              |                  |                                           |                                          |                                                         |                                                                                            |
|-----------------------------------------------------------------------------------------------------------------------------------------------|-------------------|------------------------------|------------------|-------------------------------------------|------------------------------------------|---------------------------------------------------------|--------------------------------------------------------------------------------------------|
| <b>*First Name and Middle Initial(s)</b>                                                                                                      | <b>*Last Name</b> | <b>*Suffix (eg, Jr, III)</b> | Academic Degrees | Institution                               | Location (city, state/province, country) | Role or Contribution, eg, chair, principal investigator | Group (if more than 1 Group listed in the byline and/or Subgroup (eg, Steering Committee)) |
| Alkomiet                                                                                                                                      | Hasan             |                              | MD, Prof         | University of Augsburg, Medical Faculty   | Augsburg, Germany                        | principal investigator                                  | CLOZIN                                                                                     |
| Elias                                                                                                                                         | Wagner            |                              | MD               | LMU Munich                                | Munich, Germany                          | sample collection                                       | CLOZIN                                                                                     |
| Christos                                                                                                                                      | Pantelis          |                              | MD, PhD          | University of Melbourne                   | Melbourne, Australia                     | sample collection                                       | CLOZIN                                                                                     |
| Ian P.                                                                                                                                        | Everall           |                              | MD, PhD          | King's College London                     | London, United Kingdom                   | sample collection                                       | CLOZIN                                                                                     |
| Y.                                                                                                                                            | Ayhan             |                              | MD               | Hacettepe University, Faculty of Medicine | Ankara, Turkey                           | sample collection                                       | CLOZIN                                                                                     |
| M. O.                                                                                                                                         | Babaoğlu          |                              | MD               | Hacettepe University, Faculty of Medicine | Ankara, Turkey                           | sample collection                                       | CLOZIN                                                                                     |
| Maarten                                                                                                                                       | Bak               |                              | MD, PhD          | Maastricht UMC                            | Maastricht, The Netherlands              | sample collection                                       | CLOZIN                                                                                     |
| Wouter                                                                                                                                        | Alink             |                              | Msc              | Pro Persona Mental healthcare             | Wolfheze, The Netherlands                | sample collection                                       | CLOZIN                                                                                     |
| E                                                                                                                                             | Beld              |                              | MD PhD           | North Holland North mental health         | Den Helder, The Netherlands              | sample collection                                       | CLOZIN                                                                                     |
| A                                                                                                                                             | Bouhuis           |                              | MD PhD           | Pro Persona Mental healthcare             | Wolfheze, The Netherlands                | sample collection                                       | CLOZIN                                                                                     |
| M                                                                                                                                             | Edlinger          |                              | MD               | Medical University Innsbruck              | Innsbruck, Austria                       | sample collection                                       | CLOZIN                                                                                     |
| I .M.                                                                                                                                         | Erdoğan           |                              | MD               | Hacettepe University, Faculty of Medicine | Ankara, Turkey                           | sample collection                                       | CLOZIN                                                                                     |
| Stefan                                                                                                                                        | Gutwinski         |                              | MD               | Charité Universitätsmedizin Berlin        | Berlin, Germany                          | sample collection                                       | CLOZIN                                                                                     |
| Tero                                                                                                                                          | Hallikainen       |                              | MD, PhD          | University of Eastern Finland             | Kuopio, Finland                          | sample collection                                       | CLOZIN                                                                                     |
| E                                                                                                                                             | Jeger-land        |                              | MD               | Arkin                                     | Amsterdam, The Netherlands               | sample collection                                       | CLOZIN                                                                                     |
| Markku                                                                                                                                        | Lähteenvuo        |                              | MD, PhD          | University of Eastern Finland             | Kuopio, Finland                          | sample collection                                       | CLOZIN                                                                                     |
| Mariken B.                                                                                                                                    | de Koning         |                              | MD, PhD          | Arkin                                     | Amsterdam, The Netherlands               | sample collection                                       | CLOZIN                                                                                     |

## Supplemental Online Content: Nonauthor Collaborators

\*First name, last name, and suffix (if applicable) are required and will appear in PubMed.

| *First Name and Middle Initial(s) | *Last Name        | *Suffix (eg, Jr, III) | Academic Degrees | Institution                               | Location (city, state/province, country) | Role or Contribution, eg, chair, principal investigator | Group (if more than 1 Group listed in the byline) and/or Subgroup (eg, Steering Committee) |
|-----------------------------------|-------------------|-----------------------|------------------|-------------------------------------------|------------------------------------------|---------------------------------------------------------|--------------------------------------------------------------------------------------------|
| Carla                             | Morgenroth        |                       | MD               | Charité Universitätsmedizin Berlin        | Berlin, Germany                          | sample collection                                       | CLOZIN                                                                                     |
| A.                                | Müderrişoğlu      |                       | MD, PhD          | Kırıkkale University                      | Kırıkkale, Turkey                        | sample collection                                       | CLOZIN                                                                                     |
| Tatiana                           | Oviedo-Salcedo    |                       | MD               | LMU Munich                                | Munich, Germany                          | sample collection                                       | CLOZIN                                                                                     |
| Stefanie                          | Schreiter         |                       | MD               | Charité Universitätsmedizin Berlin        | Berlin, Germany                          | principal investigator                                  | CLOZIN                                                                                     |
| Eila                              | Repo-Tiihonen     |                       | MD, PhD          | University of Eastern Finland             | Kuopio, Finland                          | sample collection                                       | CLOZIN                                                                                     |
| Heli                              | Tuppurainen       |                       | MD, PhD          | University of Eastern Finland             | Kuopio, Finland                          | sample collection                                       | CLOZIN                                                                                     |
| Mike                              | Veereschild       |                       | MD               | GGNet Mental Health                       | Warnsveld, The Netherlands               | sample collection                                       | CLOZIN                                                                                     |
| Selene R.T.                       | Veerman           |                       | MD, PhD          | GGZ NHN                                   | Alkmaar, The Netherlands                 | sample collection                                       | CLOZIN                                                                                     |
| M                                 | de Vos            |                       | Msc              | GGNet Mental Health                       | Warnsveld, The Netherlands               | sample collection                                       | CLOZIN                                                                                     |
| Dan                               | Cohen             |                       | MD, PhD          | GGZ NHN                                   | Heerhugowaard, The Netherlands           | sample collection                                       | CLOZIN                                                                                     |
| Jan P.A.M.                        | Bogers            |                       | MD               | Rivierduinen                              | Leiden, The Netherlands                  | sample collection                                       | CLOZIN                                                                                     |
| A.E.                              | Anil Yağcıoğlu    |                       | MD               | Hacettepe University, Faculty of Medicine | Ankara, Turkey                           | principal investigator                                  | CLOZIN                                                                                     |
| Jari                              | Tiihonen          |                       | MD, PhD          | University of Eastern Finland             | Kuopio, Finland                          | principal investigator                                  | CLOZIN                                                                                     |
| Stephan                           | Ripke             |                       | MD PhD           | Charité Universitätsmedizin Berlin        | Berlin, Germany                          | sample collection                                       | CLOZIN                                                                                     |
| Chad A.                           | Bousman           |                       | PhD              | University of Calgary                     | Calgary, Canada                          | sample collection                                       | CLOZIN                                                                                     |
| H                                 | Van Beek          |                       | MD PhD           | Rivierduinen mental health                | Leiden, The Netherlands                  | sample collection                                       | CLOZIN                                                                                     |
| Cynthia                           | Okhuijsen-Pfeifer |                       | PhD              | UMC Utrecht                               | Utrecht, The Netherlands                 | sample collection                                       | CLOZIN                                                                                     |

## Supplemental Online Content: Nonauthor Collaborators

\*First name, last name, and suffix (if applicable) are required and will appear in PubMed.

| *First Name and Middle Initial(s) | *Last Name      | *Suffix (eg, Jr, III) | Academic Degrees | Institution                                                                               | Location (city, state/province, country) | Role or Contribution, eg, chair, principal investigator | Group (if more than 1 Group listed in the byline) and/or Subgroup (eg, Steering Committee) |
|-----------------------------------|-----------------|-----------------------|------------------|-------------------------------------------------------------------------------------------|------------------------------------------|---------------------------------------------------------|--------------------------------------------------------------------------------------------|
| Marte                             | van der Horst   |                       | MD               | UMC Utrecht                                                                               | Utrecht, The Netherlands                 | sample collection                                       | CLOZIN                                                                                     |
| Kristel                           | van Eijk        |                       | PhD              | UMC Utrecht                                                                               | Utrecht, The Netherlands                 | sample collection                                       | CLOZIN                                                                                     |
| A.                                | Ertuğrul        |                       | MD PhD           | Hacettepe University, Faculty of Medicine                                                 | Ankara, Turkey                           | sample collection                                       | CLOZIN                                                                                     |
| G.                                | Yoca            |                       | MD               | Hacettepe University, Faculty of Medicine                                                 | Ankara, Turkey                           | sample collection                                       | CLOZIN                                                                                     |
| T.                                | Görlitz         |                       | MD PhD           | LMU Munich                                                                                | Munich, Germany                          | sample collection                                       | CLOZIN                                                                                     |
| K.P.                              | Grootens        |                       | MD PhD           | Tilburg University                                                                        | Tilburg, The Netherlands                 | sample collection                                       | CLOZIN                                                                                     |
| Stefan                            | Leucht          |                       | MD               | Dept. of Psychiatry and Psychotherapy, Technical University of Munich, School of Medicine | Munich, Germany                          | sample collection                                       | CLOZIN                                                                                     |
| A.                                | Narang          |                       | MD PhD           | University of Calgary                                                                     | Calgary, Canada                          | sample collection                                       | CLOZIN                                                                                     |
| J.                                | Schneider-Thoma |                       | MD               | Dept. of Psychiatry and Psychotherapy, Technical University of Munich, School of Medicine | Munich, Germany                          | sample collection                                       | CLOZIN                                                                                     |
| René S.                           | Kahn            |                       | MD PhD           | Mount Sinai                                                                               | New York, USA                            | principal investigator                                  | CLOZIN                                                                                     |
| Erwin                             | Bekema          |                       | Msc              | UMC Utrecht                                                                               | Utrecht, The Netherlands                 | sample collection                                       | CLOZIN                                                                                     |
| Phillip                           | Kleymann        |                       | Msc              | Charité Universitätsmedizin Berlin                                                        | Berlin, Germany                          | sample collection                                       | CLOZIN                                                                                     |
| Jurjen J.                         | Luykx           |                       | MD PhD           | Maastricht UMC                                                                            | Maastricht, The Netherlands              | principal investigator                                  | CLOZIN                                                                                     |
|                                   |                 |                       |                  |                                                                                           |                                          |                                                         |                                                                                            |
| Behrooz Z.                        | Alizadeh        |                       | MD PhD           | UMC Groningen                                                                             | Groningen, The Netherlands               | sample collection                                       | GROUP                                                                                      |

## Supplemental Online Content: Nonauthor Collaborators

\*First name, last name, and suffix (if applicable) are required and will appear in PubMed.

| *First Name and Middle Initial(s) | *Last Name     | *Suffix (eg, Jr, III) | Academic Degrees | Institution           | Location (city, state/province, country) | Role or Contribution, eg, chair, principal investigator | Group (if more than 1 Group listed in the byline) and/or Subgroup (eg, Steering Committee) |
|-----------------------------------|----------------|-----------------------|------------------|-----------------------|------------------------------------------|---------------------------------------------------------|--------------------------------------------------------------------------------------------|
| Therese                           | van Amelsvoort |                       | MD PhD           | Maastricht University | Maastricht, The Netherlands              | sample collection                                       | GROUP                                                                                      |
| Wiepke                            | Cahn           |                       | MD PhD           | UMC Utrecht           | Utrecht, The Netherlands                 | sample collection                                       | GROUP                                                                                      |
| Lieuwe                            | de Haan        |                       | MD PhD           | Amsterdam UMC         | Amsterdam, The Netherlands               | sample collection                                       | GROUP                                                                                      |
| Frederike                         | Schirmbeck     |                       | MD PhD           | Amsterdam UMC         | Amsterdam, The Netherlands               | sample collection                                       | GROUP                                                                                      |
| Claudia J.P.                      | Simons         |                       | MD PhD           | Maastricht UMC        | Maastricht, The Netherlands              | sample collection                                       | GROUP                                                                                      |
| Jim                               | van Os         |                       | MD PhD           | UMC Utrecht           | Utrecht, The Netherlands                 | sample collection                                       | GROUP                                                                                      |
| Bart                              | Rutten         |                       | MD PhD           | Maastricht UMC        | Maastricht, The Netherlands              | sample collection                                       | GROUP                                                                                      |
| Ruud                              | van Winkel     |                       | MD PhD           | KU Leuven             | Leuven, Belgium                          | sample collection                                       | GROUP                                                                                      |
| Jurjen J.                         | Luykx          |                       | MD PhD           | Maastricht UMC        | Maastricht, The Netherlands              | sample collection                                       | GROUP                                                                                      |
